# Supplementary material for: The Polymorphic PolyQ Tail Protein of the Mediator Complex, Med15, Regulates the Variable Response to Diverse Stresses
Source: MDPI journal article supplement (doi:10.3390/ijms21051894), 2020-03-10
Supplement: s1 [file s1]

Table S1: Strain list

|    | Name                                      | Background    | Specific genotype                                                                                                       | source                                                     |
|----|-------------------------------------------|---------------|-------------------------------------------------------------------------------------------------------------------------|------------------------------------------------------------|
| 1  | BY4741                                    | BY4741        | <i>MATa, his3<math>\Delta</math>0, ura3<math>\Delta</math>0, leu2<math>\Delta</math>0, met15<math>\Delta</math>0</i>    | (Brachmann <i>et al.</i> 1998)                             |
| 2  | BY4742                                    | BY4742        | <i>MATalpha, his3<math>\Delta</math>0, ura3<math>\Delta</math>0, leu2<math>\Delta</math>0, lys2<math>\Delta</math>0</i> | (Brachmann <i>et al.</i> 1998)                             |
| 3  | S288c                                     | S288c         | <i>MATa</i> (also known as GSY147)                                                                                      | (Kao <i>et al.</i> 2010)                                   |
| 4  | RM11a                                     | RM11          | <i>MATa ho::LoxP</i>                                                                                                    | (Mortimer <i>et al.</i> 1994;<br>Torok <i>et al.</i> 1996) |
| 5  | AWRI1631                                  | AWRI1631      | <i>MATa ho::LoxP</i>                                                                                                    | (Borneman <i>et al.</i> 2008)                              |
| 6  | YJM789K5a                                 | YJM789        | <i>MATa ho::HisG LYS2</i>                                                                                               | (Rong-Mullins <i>et al.</i> 2017)                          |
| 7  | BY4741 <i>med15</i>                       | BY4741        | <i>med15::KanR</i>                                                                                                      | (Tong <i>et al.</i> 2001)                                  |
| 8  | BY4741 <i>med15</i>                       | BY4741        | <i>med15::NatR</i>                                                                                                      | this study                                                 |
| 9  | BY4742 <i>med15</i>                       | BY4742        | <i>med15::NatR</i>                                                                                                      | this study                                                 |
| 10 | BY4741 <i>med2</i>                        | BY4741        | <i>med2::KanR</i>                                                                                                       | (Tong <i>et al.</i> 2001)                                  |
| 11 | BY4741 <i>med3</i>                        | BY4741        | <i>med3::KanR</i>                                                                                                       | (Tong <i>et al.</i> 2001)                                  |
| 12 | BY4741 <i>med5</i>                        | BY4741        | <i>med5::KanR</i>                                                                                                       | (Tong <i>et al.</i> 2001)                                  |
| 13 | BY4741 <i>med16</i>                       | BY4741        | <i>Med16::KanR</i>                                                                                                      | (Tong <i>et al.</i> 2001)                                  |
| 14 | BY4741 <i>med2, med15</i>                 | BY4741        | <i>med15::NatR, med2::KanR</i>                                                                                          | this study                                                 |
| 15 | YJM789K5a <i>med15<math>\Delta</math></i> | YJM789        | <i>MATa, med15::NatR, LYS2</i>                                                                                          | this study                                                 |
| 16 | Hybrid                                    | BY4741xYJM789 | <i>MATa/MATalpha, HIS3/his3, URA3/ura3,</i>                                                                             | this study                                                 |

|    |                                          |               |                                                                                                                                          |            |
|----|------------------------------------------|---------------|------------------------------------------------------------------------------------------------------------------------------------------|------------|
|    |                                          |               | <i>LEU2/leu2, LYS2/lys2, LYS5/lys5</i>                                                                                                   |            |
| 17 | <i>MED15<sup>YJM789</sup>/Δ</i>          | BY4742xYJM789 | <i>MATa/MATalpha, HIS3/his3, URA3/ura3, LEU2/leu2, LYS2/lys2, MED15<sup>YJM789</sup>/med15<sup>BY</sup>::NatR</i>                        | this study |
| 18 | <i>MED15<sup>BY</sup>/Δ</i>              | BY4742xYJM789 | <i>MATa/MATalpha, HIS3/his3, URA3/ura3, LEU2/leu2, LYS2/lys2, MED15<sup>BY</sup>/med15<sup>YJM789</sup>::NATR</i>                        | this study |
| 19 | <i>Δ/Δ</i>                               | BY4742xYJM789 | <i>MATa/MATalpha, HIS3/his3, URA3/ura3, LEU2/leu2, LYS2/lys2 med15<sup>YJM789</sup>::NatR/med15<sup>BY</sup>::KanR</i>                   | this study |
| 20 | <i>MED15<sup>YJM789</sup>-Myc/Δ</i>      | BY4742xYJM789 | <i>MATa/MATalpha, HIS3/his3, URA3/ura3, LEU2/leu2, LYS2/lys2, MET15/met15 pMED15<sup>YJM789</sup>-Myc:KanR/ med15<sup>BY</sup>::NatR</i> | this study |
| 21 | <i>MED15<sup>BY</sup>-Myc/Δ</i>          | BY4742xYJM789 | <i>MATa/MATalpha, HIS3/his3, URA3/ura3, LEU2/leu2, LYS2/lys2 MED15<sup>BY</sup>-Myc:KanR/ med15<sup>YJM789</sup>::NatR</i>               | this study |
| 22 | BY4741 wildtype empty                    | BY4741        | pGS35                                                                                                                                    | this study |
| 23 | BY4741 <i>med15</i> empty                | BY4741        | pGS35, <i>med15<sup>BY</sup>::NatR</i>                                                                                                   | this study |
| 24 | BY4741 <i>MED15<sup>S288c</sup>-Myc</i>  | BY4741        | <i>med15<sup>BY</sup>::NatR</i><br>pMED15 <sup>YJM789</sup> -Myc (pGS35 with KanR, URA3)                                                 | this study |
| 25 | BY4741 <i>MED15<sup>YJM789</sup>-Myc</i> | BY4741        | <i>med15<sup>BY</sup>::NatR</i><br>pMED15 <sup>YJM789</sup> -Myc (KanR, URA3)                                                            | this study |
| 26 | BY4741 <i>MED15<sup>BY</sup>-Myc</i>     | BY4741        | <i>MED15<sup>BY</sup>-Myc::KanR</i> (genomic integration)                                                                                | this study |

|    |                                                                                |           |                                                                                                        |                              |
|----|--------------------------------------------------------------------------------|-----------|--------------------------------------------------------------------------------------------------------|------------------------------|
| 27 | BY4741 <i>MED15</i> <sup>S288c</sup>                                           | BY4741    | <i>med15</i> <sup>BY</sup> :: <i>NatR</i><br>p <i>MED15</i> <sup>S288c</sup> (KanR)                    | this study                   |
| 28 | BY4741 <i>MED15</i> <sup>YJM789</sup>                                          | BY4741    | <i>med15</i> <sup>BY</sup> :: <i>NatR</i><br>p <i>MED15</i> <sup>S288c</sup> (KanR)                    | this study                   |
| 29 | BY4741<br><i>MED15</i> <sup>BY</sup> / <i>MED15</i> <sup>YJM789</sup> -Myc     | BY4741    | p <i>MED15</i> <sup>YJM789</sup> -Myc                                                                  | this study                   |
| 30 | BY4741<br><i>MED15</i> <sup>BY</sup> / <i>MED15</i> <sup>S288c</sup>           | BY4741    | p <i>MED15</i> <sup>S288c</sup> -Myc                                                                   | this study                   |
| 31 | YJM789 wildtype<br>empty                                                       | YJM789K5a | pGS35                                                                                                  | this study                   |
| 32 | YJM789 <i>med15Δ</i><br>empty                                                  | YJM789K5a | <i>med15</i> :: <i>NatR</i> , pGS35                                                                    | this study                   |
| 33 | YJM789<br><i>MED15</i> <sup>YJM789</sup> -Myc                                  | YJM789K5a | <i>med15</i> :: <i>NatR</i> ,<br>p <i>MED15</i> <sup>YJM789</sup> -Myc                                 | this study                   |
| 34 | YJM789 <i>MED15</i> <sup>S288c</sup><br>-Myc                                   | YJM789K5a | <i>med15</i> :: <i>NatR</i> , p <i>MED15</i> <sup>S288c</sup> -<br>Myc                                 | this study                   |
| 35 | YJM789<br><i>MED15</i> <sup>YJM789</sup> / <i>MED15</i> <sup>YJM789</sup> -Myc | YJM789K5a | p <i>MED15</i> <sup>YJM789</sup> -Myc                                                                  | this study                   |
| 36 | YJM789<br><i>MED15</i> <sup>YJM789</sup> / <i>MED15</i> <sup>S288c</sup> -Myc  | YJM789K5a | p <i>MED15</i> <sup>S288c</sup> -Myc                                                                   | this study                   |
| 37 | BY4741 <i>MED15</i> -Myc                                                       | BY4741    | p <i>MED15</i> <sup>BY</sup> -Myc                                                                      | this study                   |
| 38 | YJM789 <i>MED15</i> -Myc                                                       | YJM789    | p <i>MED15</i> <sup>YJM789</sup> -Myc                                                                  | this study                   |
| 39 | <i>put4</i>                                                                    | BY4741    | <i>put4</i> :: <i>KanR</i>                                                                             | (Tong <i>et al.</i><br>2001) |
| 40 | <i>ptr2</i>                                                                    | BY4741    | <i>ptr2</i> :: <i>KanR</i>                                                                             | (Tong <i>et al.</i><br>2001) |
| 41 | <i>yjd1</i>                                                                    | BY4741    | <i>yjd1</i> :: <i>KanR</i>                                                                             | (Tong <i>et al.</i><br>2001) |
| 42 | <i>yjd1</i> , <i>MED15</i> <sup>S288c</sup> -<br>Myc                           | BY4741    | <i>yjd1</i> :: <i>HygR</i> , <i>med15</i> :: <i>NatR</i><br>p <i>MED15</i> <sup>YJM789</sup> -Myc:KanR | this study                   |
| 43 | <i>yjd1</i> , <i>MED15</i> <sup>YJM789</sup> -<br>Myc                          | BY4741    | <i>yjd1</i> :: <i>HygR</i> , <i>med15</i> :: <i>NatR</i><br>p <i>MED15</i> <sup>YJM789</sup> -Myc:KanR | this study                   |
| 44 | <i>snf1</i>                                                                    | BY4741    | <i>snf1</i> :: <i>HygR</i>                                                                             | this study                   |

|    |                                         |        |                                                            |                           |
|----|-----------------------------------------|--------|------------------------------------------------------------|---------------------------|
| 45 | <i>reg1</i>                             | BY4741 | <i>reg1::HygR</i>                                          | this study                |
| 46 | <i>med15, snf1</i>                      | BY4741 | <i>med15::NatR, snf1::HygR</i>                             | this study                |
| 47 | <i>med15, reg1</i>                      | BY4741 | <i>med15::NatR, reg1::HygR</i>                             | this study                |
| 48 | <i>snf1, MED15<sup>S288c</sup>-Myc</i>  | BY4741 | <i>snf1::HygR, med15::NatR, pMED15<sup>S288c</sup>-Myc</i> | this study                |
| 49 | <i>snf1, MED15<sup>YJM789</sup>-Myc</i> | BY4741 | <i>snf1::HygR, med15::NatR pMED15<sup>YJM789</sup>-Myc</i> | this study                |
| 50 | <i>reg1, MED15<sup>S288c</sup>-Myc</i>  | BY4741 | <i>reg1::KanR, med15::NatR pMED15<sup>S288c</sup>-Myc</i>  | this study                |
| 51 | <i>reg1, MED15<sup>YJM789</sup>-Myc</i> | BY4741 | <i>med3::KanR, med15::NatR pMED15<sup>YJM789</sup>-Myc</i> | this study                |
| 52 | <i>snf1, MED15<sup>S288c</sup></i>      | BY4741 | <i>snf1::HygR, med15::NatR, pMED15<sup>S288c</sup></i>     | this study                |
| 53 | <i>snf1, MED15<sup>YJM789</sup></i>     | BY4741 | <i>snf1::HygR, med15::NatR pMED15<sup>YJM789</sup></i>     | this study                |
| 54 | <i>reg1, MED15<sup>S288c</sup></i>      | BY4741 | <i>reg1::KanR, med15::NatR pMED15<sup>S288c</sup></i>      | this study                |
| 55 | <i>reg1, MED15<sup>YJM789</sup></i>     | BY4741 | <i>reg1::KanR, med15::NatR pMED15<sup>S288c</sup></i>      | this study                |
| 56 | <i>yjd1</i>                             | BY4741 | <i>yjd1::KanR</i>                                          | (Tong <i>et al.</i> 2001) |
| 57 | <i>yjd1, MED15<sup>S288c</sup>-Myc</i>  | BY4741 | <i>yjd1::HygR, med15::NatR pMED15<sup>YJM789</sup>-Myc</i> | this study                |
| 58 | <i>yjd1, MED15<sup>YJM789</sup>-Myc</i> | BY4741 | <i>yjd1::HygR, med15::NatR pMED15<sup>YJM789</sup>-Myc</i> | this study                |

1. Brachmann, C.B.; Davies, A.; Cost, G.J.; Caputo, E.; Li, J.; Hieter, P.; Boeke, J.D. Designer deletion strains derived from *Saccharomyces cerevisiae* S288C: a useful set of strains and plasmids for PCR-mediated gene disruption and other applications. *Yeast* **1998**, *14*, 115–132.
2. Kao, K.C.; Schwartz, K.; Sherlock, G. A Genome-Wide Analysis Reveals No Nuclear Dobzhansky-Muller Pairs of Determinants of Speciation between *S. cerevisiae* and *S. paradoxus*, but Suggests More Complex Incompatibilities. *PLoS Genet* **2010**, *6*, e1001038.
3. Mortimer, R.K.; Romano, P.; Suzzi, G.; Polsinelli, M. Genome renewal: a new phenomenon revealed from a genetic study of 43 strains of *Saccharomyces cerevisiae* derived from natural fermentation of grape musts. *Yeast* **1994**, *10*, 1543–1552.
4. Török, T.; Mortimer, R.K.; Romano, P.; Suzzi, G.; Polsinelli, M. Quest for wine yeasts--an

old story revisited. *J. Ind. Microbiol.* **1996**, 17, 303–313.

5. Borneman, A.R.; Forgan, A.H.; Pretorius, I.S.; Chambers, P.J. Comparative genome analysis of a *Saccharomyces cerevisiae* wine strain. *FEMS Yeast Res* **2008**, 8, 1185–1195.
6. Rong-Mullins, X.; Winans, M.J.; Lee, J.B.; Lonergan, Z.R.; Pilolli, V.A.; Weatherly, L.M.; Carmenzind, T.W.; Jiang, L.; Cumming, J.R.; Oporto, G.S.; et al. Proteomic and genetic analysis of the response of *S. cerevisiae* to soluble copper leads to improvement of the antimicrobial function of cellulosic copper nanoparticles. *Metallomics* **2017**, 9, 1304–1315.
7. Tong, A.H.; Evangelista, M.; Parsons, A.B.; Xu, H.; Bader, G.D.; Page, N.; Robinson, M.; Raghibizadeh, S.; Hogue, C.W.; Bussey, H.; et al. Systematic genetic analysis with ordered arrays of yeast deletion mutants. *Science (80-. )*. **2001**, 294, 2364–2368.
