# Supplementary material for: The Polymorphic PolyQ Tail Protein of the Mediator Complex, Med15, Regulates the Variable Response to Diverse Stresses
Source: MDPI journal article supplement (doi:10.3390/ijms21051894), 2020-03-10
Supplement: s1 [file s1]

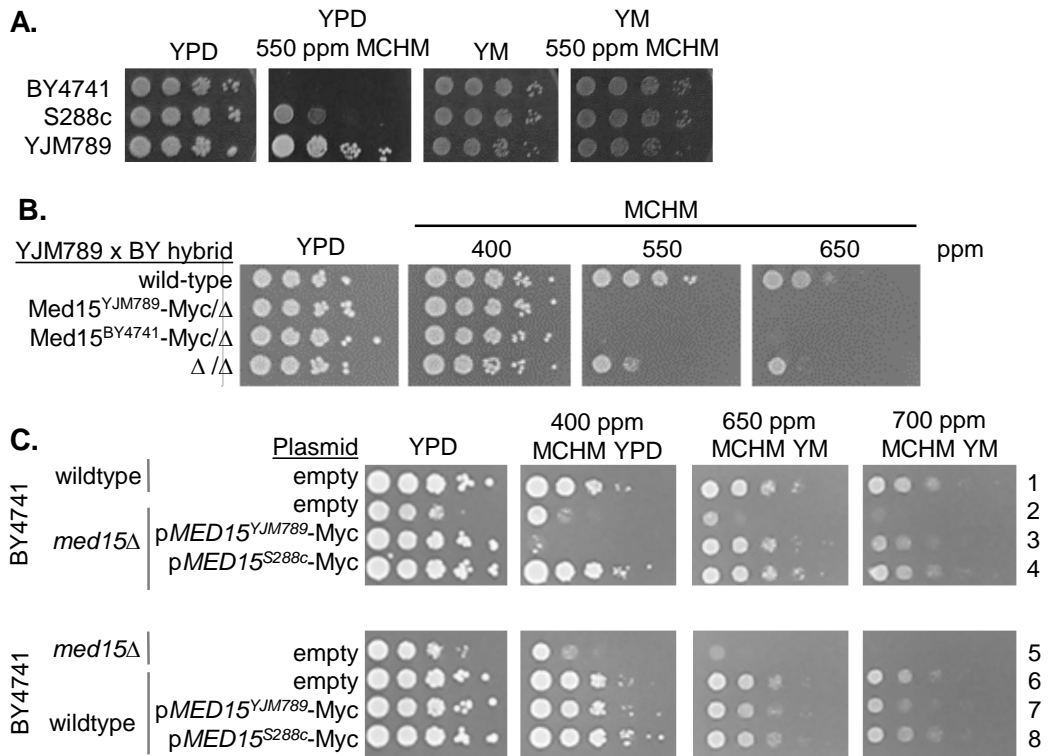

**Figure S2 Gallagher**

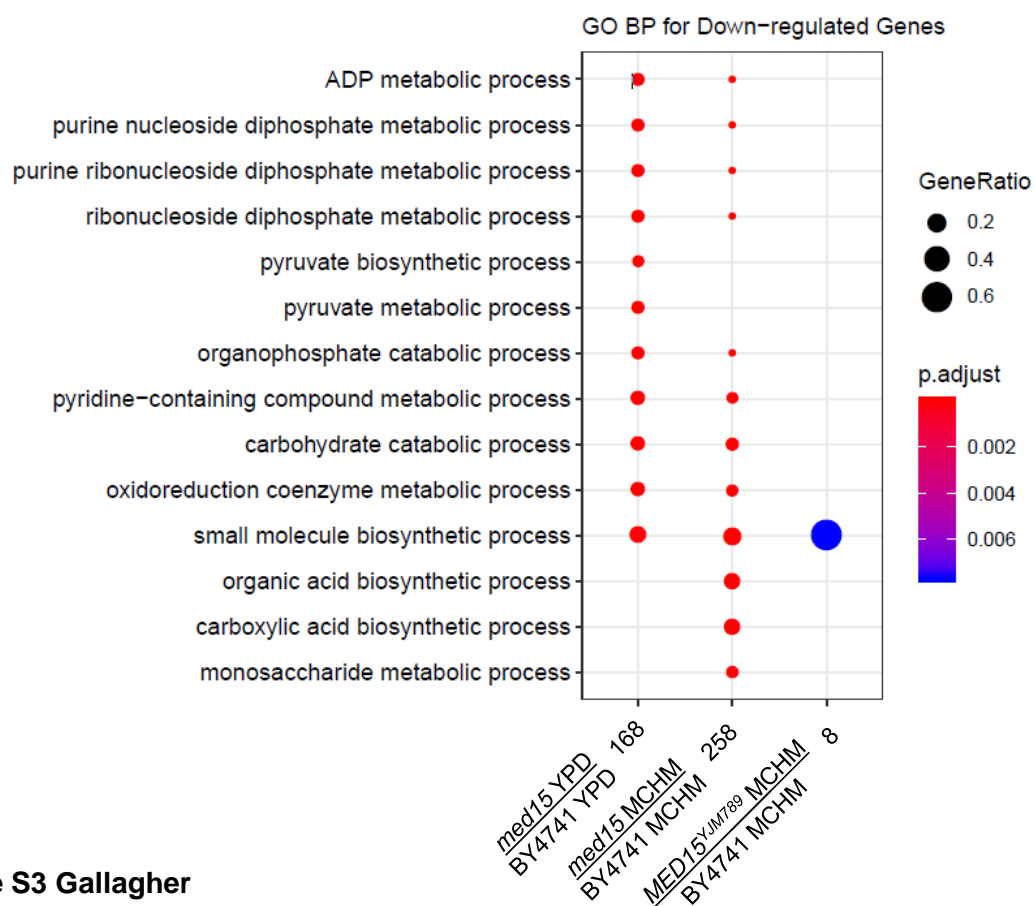

Figure S3 Gallagher

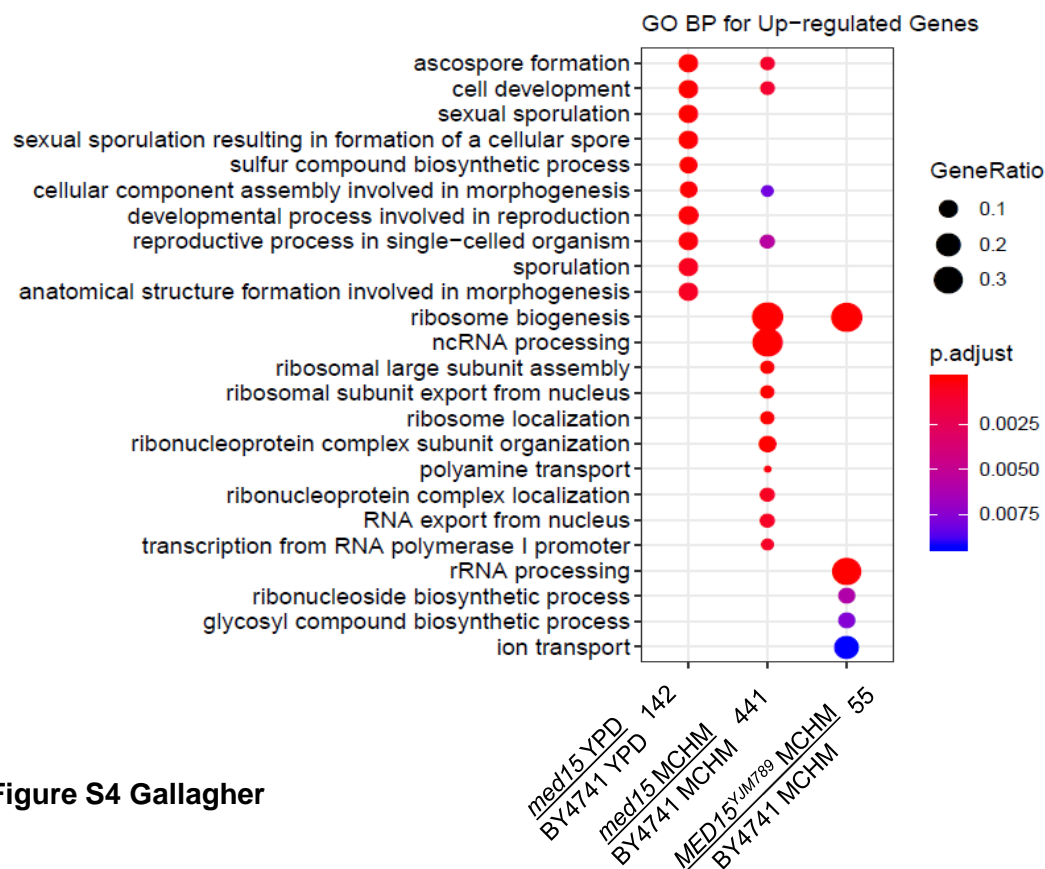

Figure S4 Gallagher

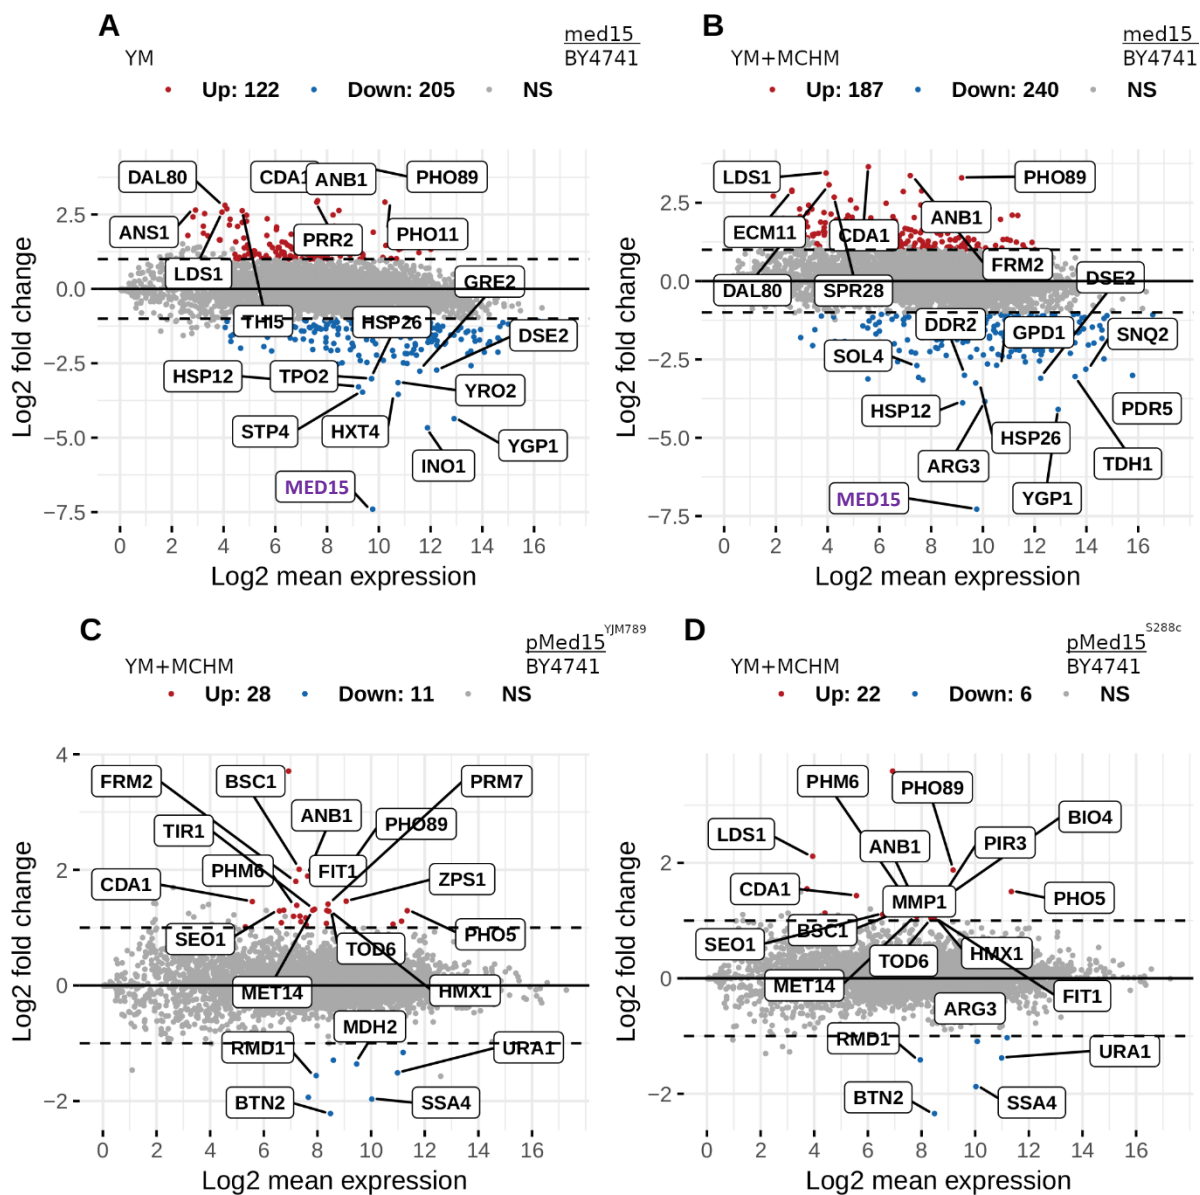

**Figure S5 Gallagher**

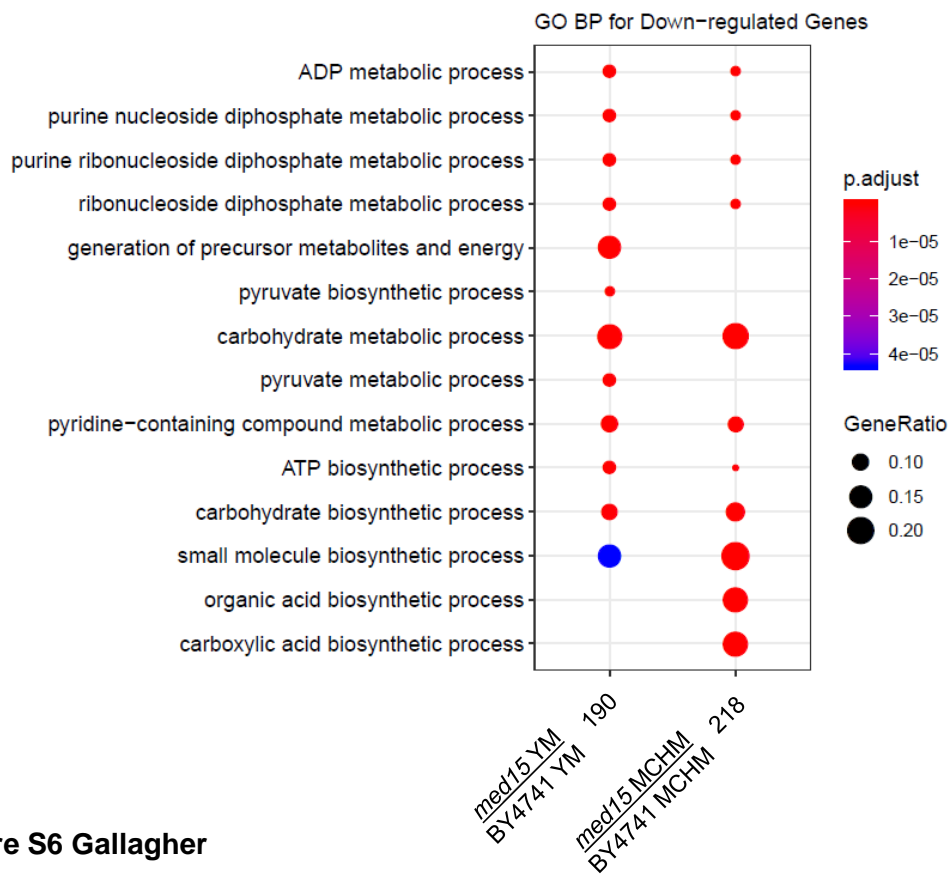

Figure S6 Gallagher

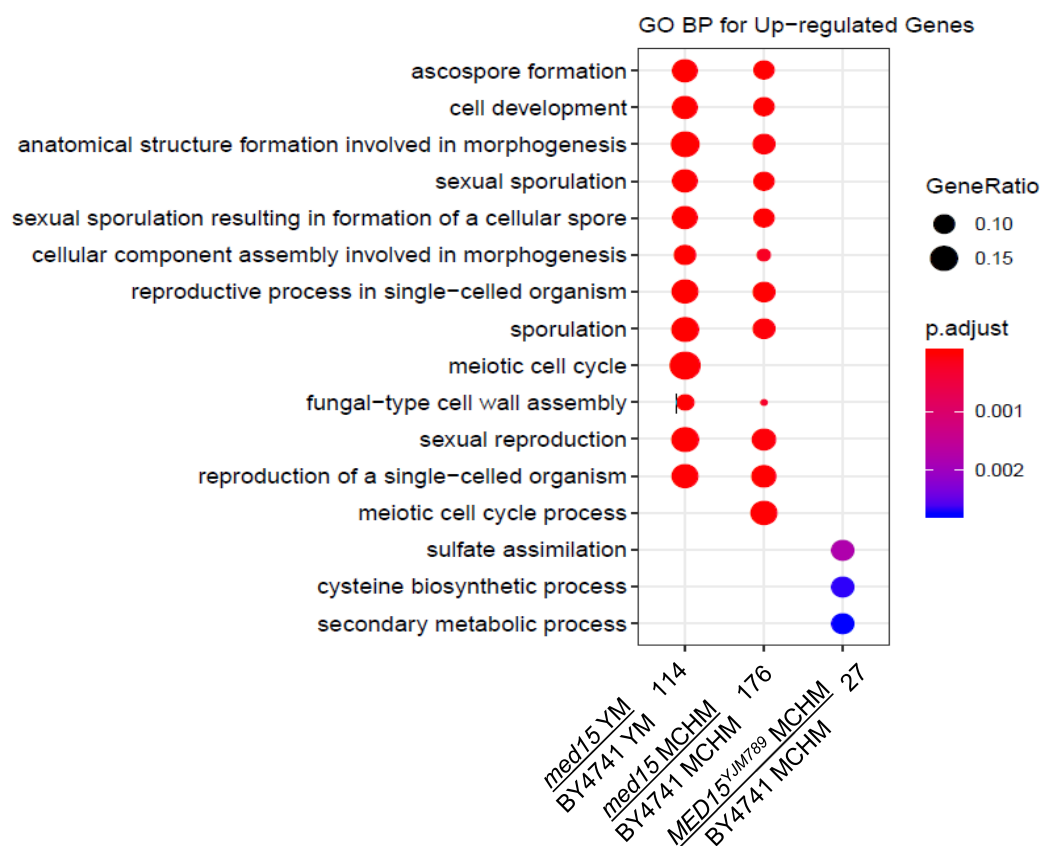

Figure S7 Gallagher

group ■ no call ■ SAGA-dominated ■ SAGA/TFIID ■ TFIID-dominated

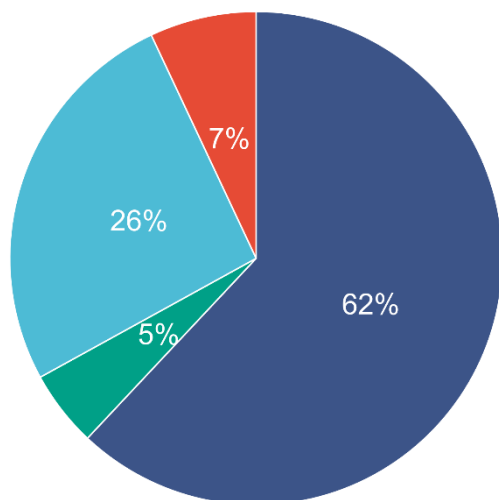

**Figure S8 Gallagher**



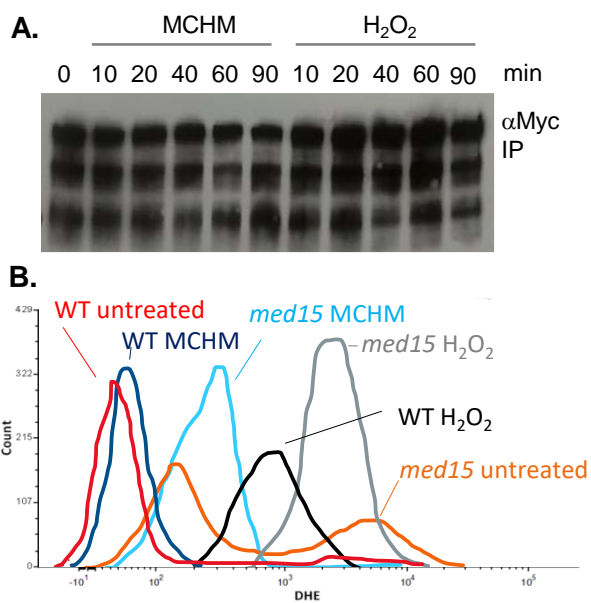

**Figure S9 Gallagher**

A.

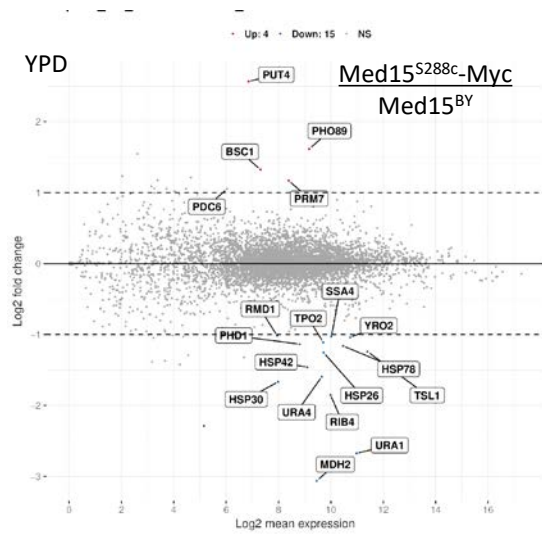

B.

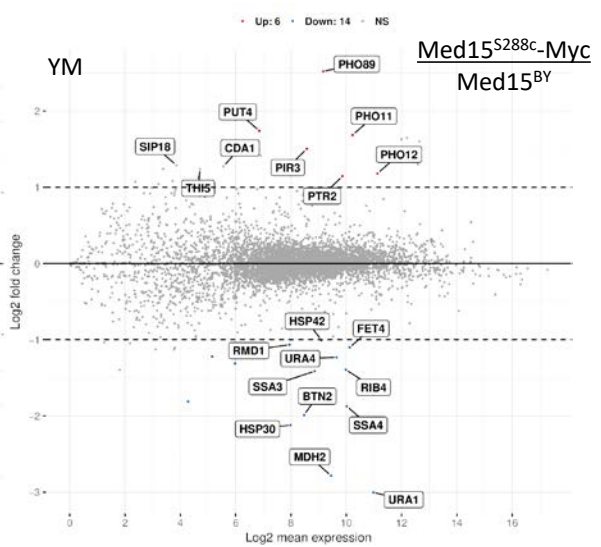

C.

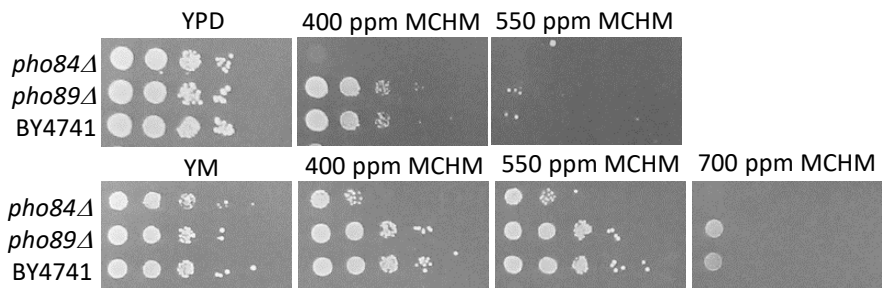

D.

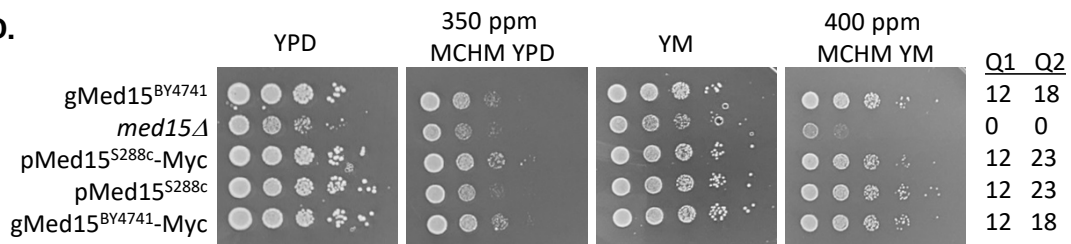

Figure S10 Gallagher
