# Supplementary material for: The Polymorphic PolyQ Tail Protein of the Mediator Complex, Med15, Regulates the Variable Response to Diverse Stresses
Source: MDPI journal article supplement (doi:10.3390/ijms21051894), 2020-03-10
Supplement: s1 [file s1]

| #     | name                            | -/+  | note                    | 5' to 3'                                                              |
|-------|---------------------------------|------|-------------------------|-----------------------------------------------------------------------|
| 4.38  | 3'KanB                          | 151  | KO check                | ATGTACGGGCGACAGTCACATCAT                                              |
| 5.56  | 3'MycB                          | 566  | Myc check               | GTGGCGCGAATTCAGTAGTG                                                  |
| 8.92  | 5'Med15KO                       |      | Knockout                | TCAAAGATCAAGGATTAACGCTATTTCTTT<br>TAAATCTGCTCAGCTGAAGCTTCGTACGC       |
| 8.93  | 5'Med15 C-Myc                   |      | tagging                 | CAATTCAATGTATGGGATTGGAATAATTGGA<br>CAAGTGCTACT TTA ATT AAC GGT GAA CA |
| 8.94  | 3'Med15 <sup>5288c</sup> tag&KO |      | Tagging and<br>knockout | AGTAACTTCAAAAGTATCAAAAGTATGGAAA<br>CTTCAAATGTTTACGACTCACTATAGGGA      |
| 8.95  | 5'Med15a                        | -141 | KO check                | AAGTACTTCCACGACATTGC                                                  |
| 8.96  | 5'Med15c                        | 3202 | Myc check               | TTCTGGGACTAGTTCAGAAC                                                  |
| 9.17  | 3'Med15 <sup>789</sup> tag&KO   |      | Tagging and<br>knockout | CACCAAACGAAGTAACTTCAAAAGTATGGAA<br>ACTTCAAATGTTACGACTCACTATAGGGA      |
| 9.56  | 5'Med15 cloning                 | -499 | NotI                    | TGGCGGCCGCTAACAAGCAATTACATATTCC                                       |
| 9.65  | 5'Med15+295                     | 319  | QI insert               | CCGTGGAACAGCACCATATTAACA                                              |
| 9.68  | 3'Med15+754                     | 721  | QI insert               | CTTGAGCCTGTGCTTGTGT                                                   |
| 9.66  | 3'Med15+399                     | 397  | -QI vector              | GCTGATTCAAGAACATCTGTGGGTTTAG                                          |
| 9.67  | 5'Med15_Q2                      | 541  | -QI vector              | GTGGCACCTATTCCCAAAC                                                   |
| 11.18 | 5'Med15+574                     | 1916 | QII insert              | GCAAATGGCAAACAACAATGG                                                 |
| 9.69  | 3'Med15end                      | 3239 | QII insert              | GCACTTGTCCAATTATTCCAATCCC                                             |
| 11.19 | 3'Med15_Q2                      | 1936 | -QII vector             | TAGAAGTAGTGCCTGGGTTC                                                  |
| 8.96  | 5'Med15c                        | 3202 | -QII vector             | TTCTGGGACTAGTTCAGAAC                                                  |
|       |                                 |      |                         |                                                                       |
